# Supplementary material
Source: Springer Nature journal article supplement (https://www.springermedizin.de/resource/supplementary/12991_2011_1319_MOESM3_ESM.pdf/9613796)

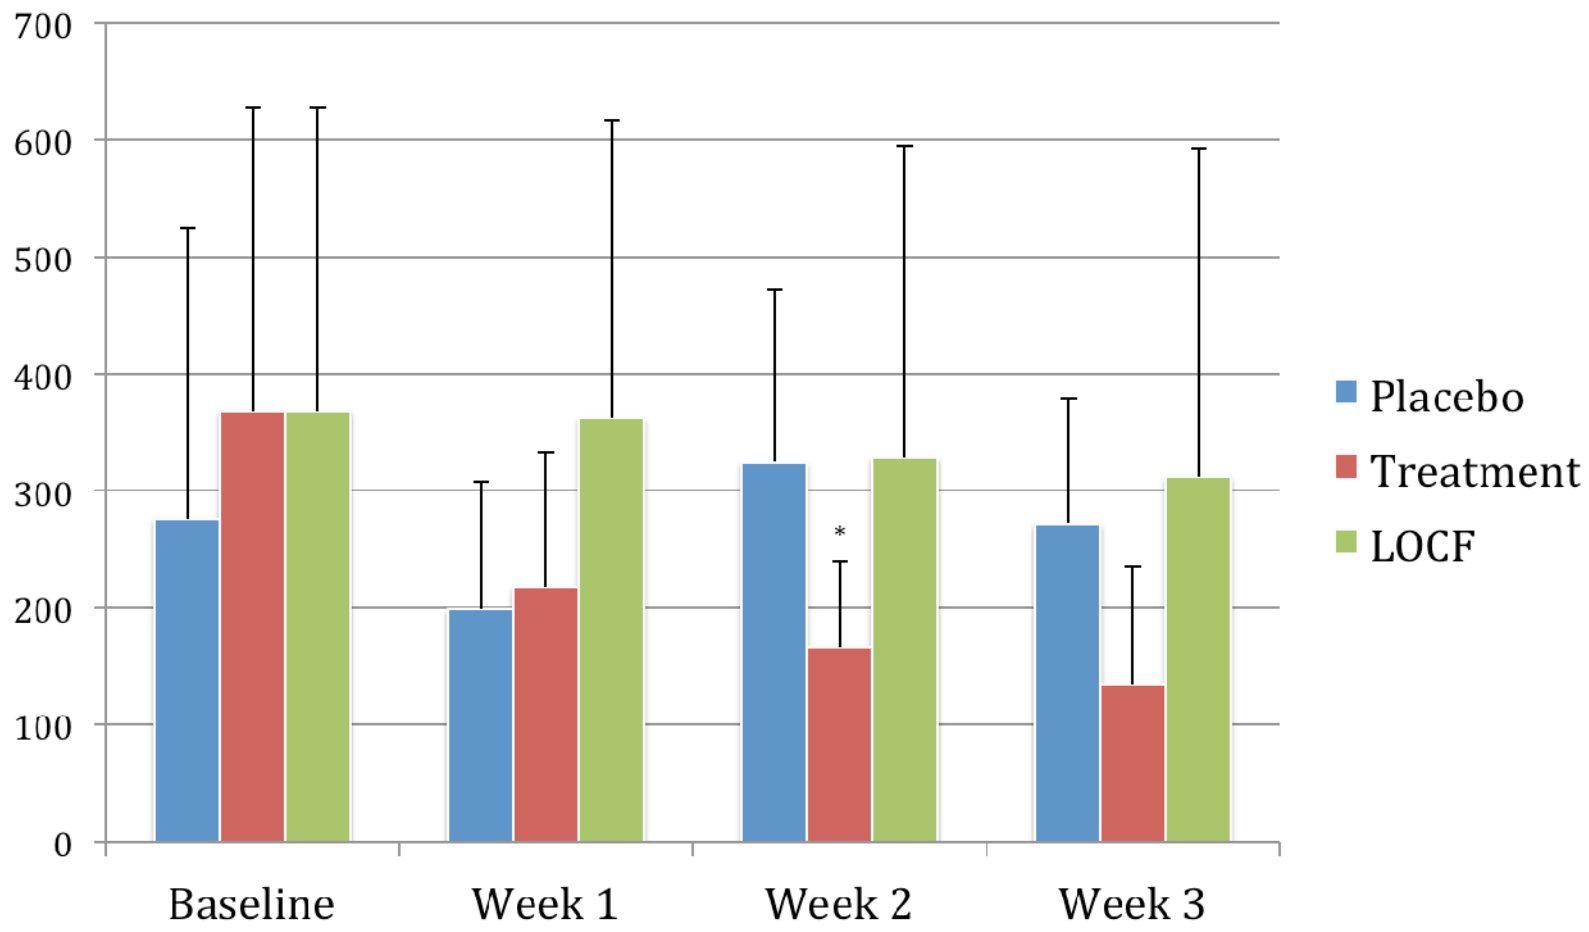

Supplement: MOESM3 [file 9613796]
